# Supplementary material for: Bioinformatics process management: information flow via a computational journal
Source: Springer Nature journal article supplement (doi:10.1186/1751-0473-2-9), 2007-12-01
Supplement: 13029_2007_17_MOESM1_ESM.pdf [file 13029_2007_17_MOESM1_ESM.pdf]

Navigator Shell

- ▶ Amino Acid Sequences
- ▼ demo
  - ▶ Example Experiment
  - ▼ MD Example
    - ▶ Energy Min
    - ▶ Energy Min Plot (jpg)
    - ▶ Lysozyme/1AKI (pdb)
    - ▶ Lysozyme Min Params
    - ▶ MD Sim
    - ▶ Tutorial Example
- ▶ edk Sequence Data
- ▶ edk tests
- ▶ GROMACS Resources
- ▶ Ifeagan's journal
- ▶ Sequence Resources - Core
- ▶ Standard Formats
- ▶ System Journal

Dependents

- ▼ Tutorial Example
  - ▶ Tutorial Example Run
    - ▶ Error File Tutorial Example Run
    - ▶ Structure w/water
    - ▶ Energy
    - ▶ Structure
    - ▶ Trajectory

Tutorial Example

MD Sim

Energy Min

Lysozyme Min Params

5

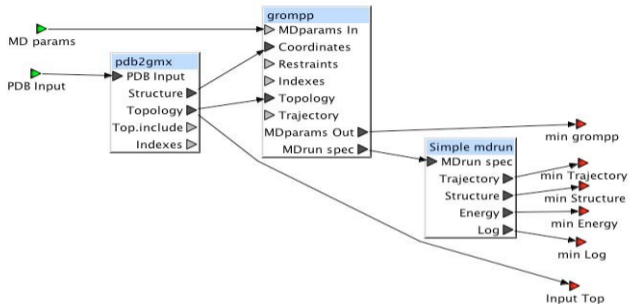

Properties

Queue Manager

Error Log

| Property      | Value             |
|---------------|-------------------|
| Content Size  | 5903              |
| Content Type  | Workflow          |
| Group Access  | ALL               |
| Is Committed  | true              |
| Journal       | //demo/MD Example |
| Last Modified | 2006-09-28        |
| Name          | Energy Min        |
| Owner         | demo              |
