# Supplementary material for: Bioinformatics process management: information flow via a computational journal
Source: Springer Nature journal article supplement (doi:10.1186/1751-0473-2-9), 2007-12-01

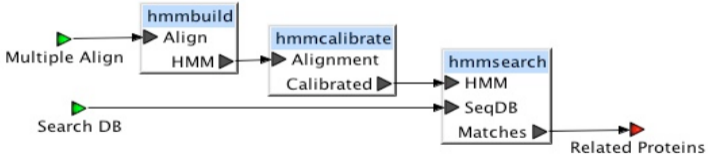

Supplement: 13029_2007_17_MOESM3_ESM.pdf [file 13029_2007_17_MOESM3_ESM.pdf]
