# Supplementary material for: Bioinformatics process management: information flow via a computational journal
Source: Springer Nature journal article supplement (doi:10.1186/1751-0473-2-9), 2007-12-01
Supplement: 13029_2007_17_MOESM4_ESM.pdf [file 13029_2007_17_MOESM4_ESM.pdf]

## Dependencies

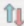

- ▼  Tutorial Example Run
  -  Lysozyme Min Params
  -  Lysozyme/1AKI (pdb)
  -  fullmd\_sol.mdp
  -  spc216.gro
  - ▼  Tutorial Example
    - ▶  Energy Min
    -  SINK
