# Supplementary material for: Bioinformatics process management: information flow via a computational journal
Source: Springer Nature journal article supplement (doi:10.1186/1751-0473-2-9), 2007-12-01
Supplement: 13029_2007_17_MOESM6_ESM.pdf [file 13029_2007_17_MOESM6_ESM.pdf]

HMMER 2.3.2 (Oct 2003)

Copyright (C) 1992-2003 HHMI/Washington University School of Medicine

Freely distributed under the GNU General Public License (GPL)

-----  
HMM file: /bio/data/journal/experiments/2013/tmp4 [tmp1]  
Sequence database: /bio/data/journal/experiments/2013/1917  
per-sequence score cutoff: [none]  
per-domain score cutoff: [none]  
per-sequence Eval cutoff: <= 10  
per-domain Eval cutoff: [none]  
-----

Query HMM: tmp1

Accession: [none]

Description: [none]

[HMM has been calibrated; E-values are empirical estimates]

Scores for complete sequences (score includes all domains):

| Sequence                                     | Description | Score | E-value  | N |
|----------------------------------------------|-------------|-------|----------|---|
| Plasmodium_falciparum_3D7 MAL11 PF11_0377 Pf | Annotation  | 494.3 | 8.7e-146 | 1 |
| Plasmodium_falciparum_3D7 MAL6 PFF0520w Pf   | Annotation  | 34.6  | 2.5e-10  | 1 |
| Plasmodium_falciparum_3D7 MAL11 PF11_0242 Pf | Annotation  | 27.5  | 7.3e-10  | 1 |
| Plasmodium_falciparum_3D7 MAL7 PF07_0072 Pf  | Annotation  | 25.6  | 9.8e-10  | 1 |
| Plasmodium_falciparum_3D7 MAL12 PFL1885c Pf  | Annotation  | 23.8  | 1.3e-09  | 1 |
| Plasmodium_falciparum_3D7 MAL3 PFC0420w Pf   | Annotation  | 22.5  | 1.6e-09  | 1 |
| Plasmodium_falciparum_3D7 MAL12 PFL1370w Pf  | Annotation  | 22.2  | 1.6e-09  | 1 |
| Plasmodium_falciparum_3D7 MAL12 PFL2250c Pf  | Annotation  | 18.4  | 2.8e-09  | 1 |
| Plasmodium_falciparum_3D7 MAL11 PF11_0239 Pf | Annotation  | 17.6  | 3.2e-09  | 1 |
| Plasmodium_falciparum_3D7 MAL14 PF14_0294 Pf | Annotation  | 9.9   | 1e-08    | 1 |
