# Supplementary material for: Bioinformatics process management: information flow via a computational journal
Source: Springer Nature journal article supplement (doi:10.1186/1751-0473-2-9), 2007-12-01
Supplement: 13029_2007_17_MOESM7_ESM.pdf [file 13029_2007_17_MOESM7_ESM.pdf]

Navigator Shell

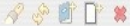

Amino Acid Sequences

demo

Example Experiment

Casein Comparison

Casein Comparison-Run.1

Casein Comparison

Casein Comparison-Run.1

Casien poor candidate

In this experiment the top match from PlasmoDB was gene ID PF11\_0377 which encodes *P. falciparum*s casein kinase 1. So, we don't believe that >gi|23199991|ref|NP\_689407.1| casein kinase 1 epsilon [Homo sapiens] would be a good candidate for a malaria drug therapy.
